# Supplementary material
Source: publisher figshare collection journal article supplement (https://asha.figshare.com/articles/dataset/_/13022900)
Supplement: Supplementary file 1 [file 1]

Archive with 2 entries (2 files):
- JSLHR-20-00174oneill_SuppS1.pdf
- JSLHR-20-00174oneill_SuppS2.pdf
