# Supplementary material
Source: publisher figshare collection journal article supplement (https://asha.figshare.com/articles/dataset/_/13022900)
Supplement: Supplementary file 1 [file 1 › JSLHR-20-00174oneill_SuppS2.pdf]

### Context Sentences

The milk and cheese smelled \_\_\_\_\_.

My strong \_\_\_\_\_ carried my brother.

The family \_\_\_\_\_ in an expensive restaurant.

This new computer is \_\_\_\_\_ useful.

The \_\_\_\_\_ broke a glass window.

My grandmother \_\_\_\_\_ a chocolate cake.

The party game was \_\_\_\_\_ easy.

That \_\_\_\_\_ sells cheap clothes.

The kitchen garbage smelled \_\_\_\_\_.

The \_\_\_\_\_ write simple problems.

The trees \_\_\_\_\_ sweet apples.

Some \_\_\_\_\_ drink black coffee.

Her grandparents are serious and sometimes \_\_\_\_\_.

The last year was \_\_\_\_\_ and peaceful.

The popular club is often \_\_\_\_\_.

My neighbor sings country \_\_\_\_\_.

The tiny fly \_\_\_\_\_ everyone.

The fish swam \_\_\_\_\_ in the lake.

A \_\_\_\_\_ country is exciting to visit.

The church \_\_\_\_\_ inspired the community.

The news was on TV \_\_\_\_\_ morning.

The wind damaged the \_\_\_\_\_ boat.

The stars \_\_\_\_\_ the night sky.

Her apartment was near the private \_\_\_\_\_.

The \_\_\_\_\_ and trees look beautiful.

The restaurant \_\_\_\_\_ red wine.

She drove the bus down the \_\_\_\_\_.

The spicy carrots were her favorite \_\_\_\_\_.

The strange animal scared the \_\_\_\_\_.

My brother sleeps until \_\_\_\_\_ morning.

The small boy seemed \_\_\_\_\_.

Our \_\_\_\_\_ drinks orange juice.

A \_\_\_\_\_ kitten climbed over the fence.

The chicken soup was a \_\_\_\_\_ meal.

That \_\_\_\_\_ animal is cute but dangerous.

A summer vacation is \_\_\_\_\_ relaxing.

The \_\_\_\_\_ learned about earth science.

The boss \_\_\_\_\_ the lazy waiter.

Some writers \_\_\_\_\_ interesting stories.

They played fast \_\_\_\_\_ on the radio.

The best worker went on the \_\_\_\_\_.

Their \_\_\_\_\_ son danced well.

### Key

horrible

father

ate

quite

baseball

baked

really

store

terrible

professor

grow

people

cruel

calm

full

songs

bothered

slowly

foreign

group

every

tiny

lit

school

plants

sells

street

dish

baby

late

sad

mother

little

tasty

tiny

always

class

fired

tell

music

trip

famous

### Participant responses (Synonym)

stinky

dad

dined

very

ball

made

pretty

shop

horrible, bad

teacher

produced (2)

folks

stern

quiet, relaxing

crowded

music

annoys

quickly

new

congregation

each

little

illuminated

campus

flowers

served, serves

road

food

kid

mid

scared (2)

mom

young

good

small

very, quite

students (2)

scolds

write

songs

vacation

talented

The \_\_\_\_\_ destroyed some plants.  
 Those cute animals \_\_\_\_\_ the plants.  
 His grandma and grandpa helped the \_\_\_\_\_.  
 The big \_\_\_\_\_ felt empty.  
 The honest mother is loving and \_\_\_\_\_.  
 The lonely ducks swims in the \_\_\_\_\_.  
 Her uncle \_\_\_\_\_ quietly for the answer.  
 The instructor \_\_\_\_\_ books to her class.  
 These colleges offer many \_\_\_\_\_.  
 The \_\_\_\_\_ used soft brushes.  
 The Christmas \_\_\_\_\_ interested my son.  
 The \_\_\_\_\_ lays tiny eggs.  
 The chef \_\_\_\_\_ pasta every day.  
 Her youngest son was always \_\_\_\_\_.  
 They \_\_\_\_\_ salty meat in the pan.  
 That \_\_\_\_\_ carried six bags.  
 A lonely person is usually \_\_\_\_\_.  
 They loved the French \_\_\_\_\_ and dessert.  
 The party \_\_\_\_\_ for three hours.  
 The teacher \_\_\_\_\_ homework daily.  
 The old shirt was warm and \_\_\_\_\_.  
 That fast \_\_\_\_\_ chased a mouse.  
 The student studies in the quiet \_\_\_\_\_.  
 The \_\_\_\_\_ serves dinner and drinks.  
 My cousin \_\_\_\_\_ my a birthday cake.  
 The tropical \_\_\_\_\_ had many trees.  
 He \_\_\_\_\_ loudly in the crowded room.  
 The green \_\_\_\_\_ look healthy.  
 The artist took a \_\_\_\_\_ picture.  
 The performer worked for little \_\_\_\_\_.  
 The \_\_\_\_\_ looked perfectly calm.  
 The boss tells horrible \_\_\_\_\_.  
 The Catholic priest sang \_\_\_\_\_.  
 The slow computer had many \_\_\_\_\_.  
 That new book is \_\_\_\_\_ helpful.  
 The \_\_\_\_\_ hung above the door.  
 That goat \_\_\_\_\_ in the deep hole.  
 The talented artist drew a \_\_\_\_\_.  
 The jazz \_\_\_\_\_ sounded great.  
 The lesson seemed too \_\_\_\_\_.  
 The bird flew \_\_\_\_\_ the sea.  
 The company \_\_\_\_\_ foreign cars.  
 The young woman is \_\_\_\_\_ smart.

|            |                    |
|------------|--------------------|
| rain       | storm              |
| chewed     | eat (2)            |
| kids       | child              |
| room       | house              |
| nice       | caring             |
| lake       | pond (2)           |
| waits      | listens            |
| gave       | brought, brings    |
| courses    | classes            |
| painter    | artist             |
| show       | play               |
| bird       | chicken            |
| cooks      | made               |
| upset      | crying             |
| roasted    | cooked (2)         |
| boy        | man (2)            |
| unhappy    | sad                |
| food       | meal, dinner       |
| lasted     | continued          |
| gave       | assigned (2)       |
| soft       | fuzzy, comfortable |
| kitten     | cat (2)            |
| room       | library            |
| restaurant | diner              |
| baked      | made               |
| forest     | rainforest         |
| screamed   | yelled             |
| plants     | grass              |
| beautiful  | pretty             |
| money      | pay                |
| ocean      | sea                |
| jokes      | stories (2)        |
| songs      | hymns              |
| problems   | viruses            |
| really     | very               |
| picture    | sign               |
| fell       | jumped (2)         |
| picture    | portrait           |
| singer     | concert, ensemble  |
| difficult  | complicated        |
| over       | above              |
| buys       | purchased          |
| very       | incredibly         |

A pretty boat went down the \_\_\_\_\_.  
 The two friend \_\_\_\_\_ up the mountain.  
 The nurses work hard every \_\_\_\_\_.  
 The nurses work hard every \_\_\_\_\_.  
 The couple sang the \_\_\_\_\_ well.  
 The hot sun \_\_\_\_\_ the pool.  
 The divorced couple sat at the \_\_\_\_\_.  
 Our business paid for the daily \_\_\_\_\_.  
 The vegetables grew in the green \_\_\_\_\_.  
 The \_\_\_\_\_ wrote thirty books.  
 The helpful nanny cleaned the \_\_\_\_\_.  
 The \_\_\_\_\_ lady give advice.  
 The team \_\_\_\_\_ goals easily.

### Context Sentences

The \_\_\_\_\_ loves sweet candy.  
 The park opens in \_\_\_\_\_ months.  
 The worried adult \_\_\_\_\_ home.  
 The \_\_\_\_\_ bears eat fruit.  
 The woman met her favorite \_\_\_\_\_.  
 The glass \_\_\_\_\_ broke in the kitchen.  
 The twins live with their \_\_\_\_\_.  
 The sun sets in the late \_\_\_\_\_.  
 The hungry \_\_\_\_\_ made a sandwich.  
 Her black \_\_\_\_\_ looked funny.  
 His \_\_\_\_\_ tell boring stories.  
 Her thoughtful \_\_\_\_\_ sent flowers.  
 The kind \_\_\_\_\_ helps strangers.  
 The fat pig \_\_\_\_\_ on the floor.  
 The talented \_\_\_\_\_ received an award.  
 They bought three \_\_\_\_\_ cars.  
 The \_\_\_\_\_ juice spilled on the floor.  
 Our \_\_\_\_\_ drinks orange juice.  
 The snowman had \_\_\_\_\_ green gloves.  
 The dark cloud covered the \_\_\_\_\_.  
 The meeting starts in \_\_\_\_\_ minutes.  
 That \_\_\_\_\_ test was really difficult.  
 The three \_\_\_\_\_ did their math homework.  
 His grandma and grandpa helped the \_\_\_\_\_.  
 The happy \_\_\_\_\_ laugh at the story.  
 They took a \_\_\_\_\_ picture every year.  
 The shopper bought \_\_\_\_\_ things.  
 My grandmother read the \_\_\_\_\_ quickly.  
 The \_\_\_\_\_ team practiced at night.

river  
 hiked  
 day  
 day  
 song  
 warmed  
 table  
 newspaper  
 garden  
 author  
 house  
 kind  
 scored  
 stream  
 climbed  
 shift  
 shift  
 anthem  
 heated  
 desk  
 paper  
 yard  
 writer  
 room (2)  
 nice  
 shoots

### Key

girl  
 eleven  
 ran  
 brown  
 actor  
 dish  
 grandparents  
 afternoon  
 girl  
 sweater  
 parents  
 boyfriend  
 girl  
 slept  
 writer  
 blue  
 grape  
 mother  
 two  
 sky  
 twenty  
 English  
 cousins  
 kids  
 children  
 school  
 many  
 newspaper  
 tennis  
 (Same category)  
 child, boy  
 two  
 walks, came  
 black (2)  
 celebrity  
 cup  
 grandmother  
 evening (2)  
 boy, man  
 shirt  
 grandparents  
 husband (2)  
 person, woman  
 lay, laid  
 musician  
 red  
 cranberry  
 father  
 four  
 sun  
 five, ten  
 math (2)  
 kids, siblings  
 son  
 teenagers, people  
 family (2)  
 ten  
 book (2)  
 soccer

The fans watched \_\_\_\_\_ games.  
 Her \_\_\_\_\_ watched movies with another girl.  
 The artist studies \_\_\_\_\_ and French.  
 The \_\_\_\_\_ ring fit her finger.  
 The \_\_\_\_\_ sandwich came with salad.  
 The \_\_\_\_\_ sandwich came with salad.  
 The dedicated \_\_\_\_\_ help patients.  
 My \_\_\_\_\_ made wooden chairs.  
 Their oldest \_\_\_\_\_ plays with toys.  
 A little \_\_\_\_\_ runs through the forest.  
 The player \_\_\_\_\_ the soccer ball.  
 Her right arm and \_\_\_\_\_ were broken.  
 The hungry teenagers eat \_\_\_\_\_.

#### Context Sentences

The wooden door was hard to \_\_\_\_\_.  
 Our team practices every \_\_\_\_\_.  
 The \_\_\_\_\_ night was comfortable and relaxing.  
 The customers \_\_\_\_\_ black tea.  
 The city bus is usually \_\_\_\_\_.  
 The show \_\_\_\_\_ early today.  
 The worker hurt his \_\_\_\_\_ hand.

#### Nonsense Sentences

The weekend is expensive and \_\_\_\_\_ sad.  
 A child \_\_\_\_\_ down the office.  
 The hot horse is \_\_\_\_\_ worried.  
 A dangerous weekend is \_\_\_\_\_ thirsty.  
 The painter cut milk \_\_\_\_\_ day.  
 The \_\_\_\_\_ travelled some room.  
 The math store was \_\_\_\_\_ relaxing.  
 The sweet group is \_\_\_\_\_ slow.

#### Nonsense Sentences

My \_\_\_\_\_ ran every sun.  
 The \_\_\_\_\_ and cloud screamed their mother.  
 They wrote cake in the \_\_\_\_\_ police.

football  
 boyfriend  
 Italian  
 gold  
 chicken  
 chicken  
 nurses  
 grandfather  
 daughter  
 rabbit  
 kicked  
 leg  
 snacks

#### Key

close  
 night  
 cool  
 hate  
 early  
 ended  
 left

baseball  
 friend  
 spanish  
 diamond  
 turkey  
 beef  
 doctors, surgeon  
 father  
 child, son  
 fox  
 hits  
 hip  
 pizza

#### (Antonyms)

open (2)  
 day  
 warm  
 love, loves  
 late  
 started  
 right (2)

#### Key

not  
 chased  
 too  
 really  
 every  
 trip  
 always  
 very

#### Key

girl  
 sister  
 green

#### (Synonyms)

never  
 ran  
 very  
 very  
 all  
 tour  
 very  
 really

#### (Same category)

son  
 child, boy  
 blue
